# Supplementary material for: AKT1low quiescent cancer cells persist after neoadjuvant chemotherapy in triple negative breast cancer
Source: Springer Nature journal article supplement (doi:10.1186/s13058-017-0877-7), 2017-08-01

A

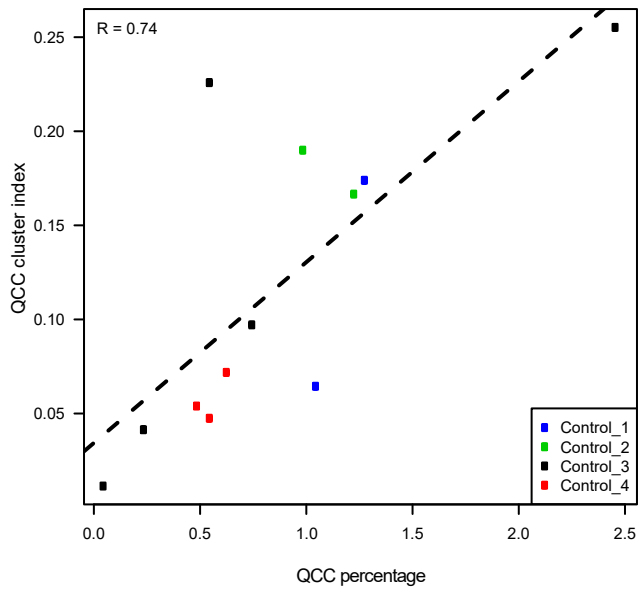

B

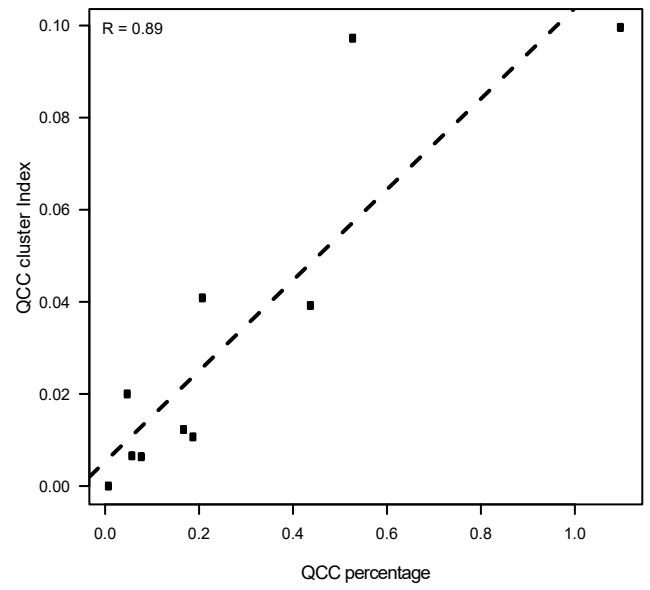

C

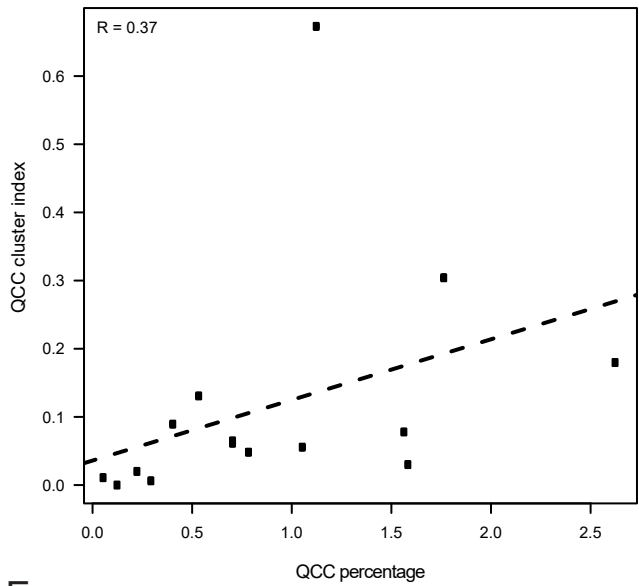

D

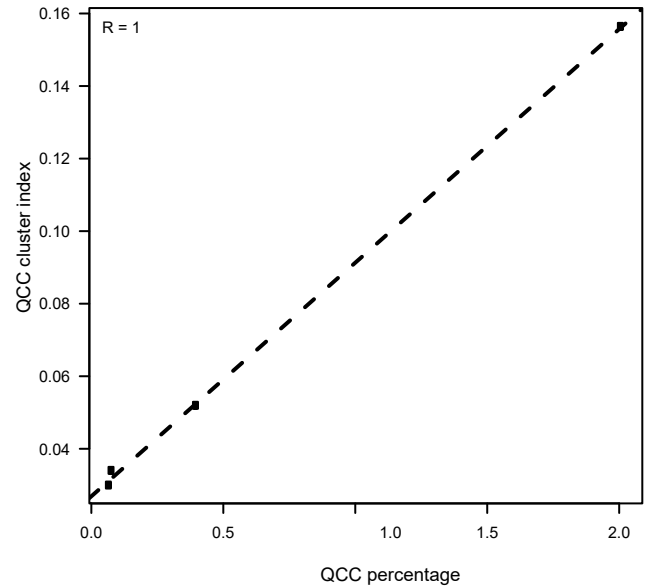

E

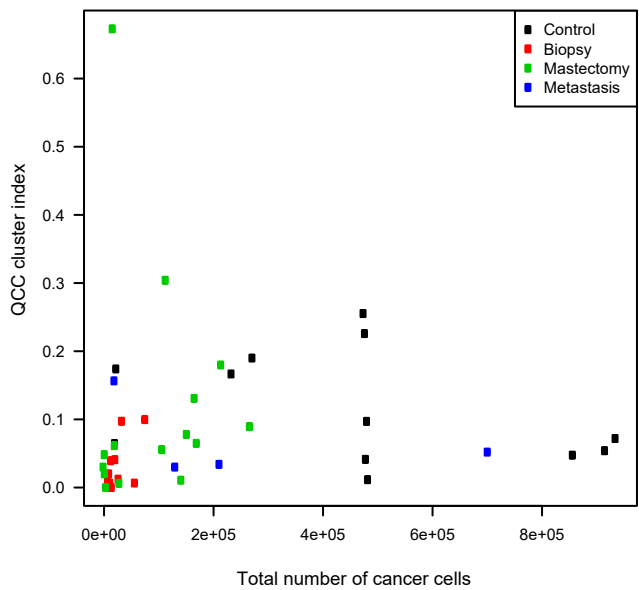

F

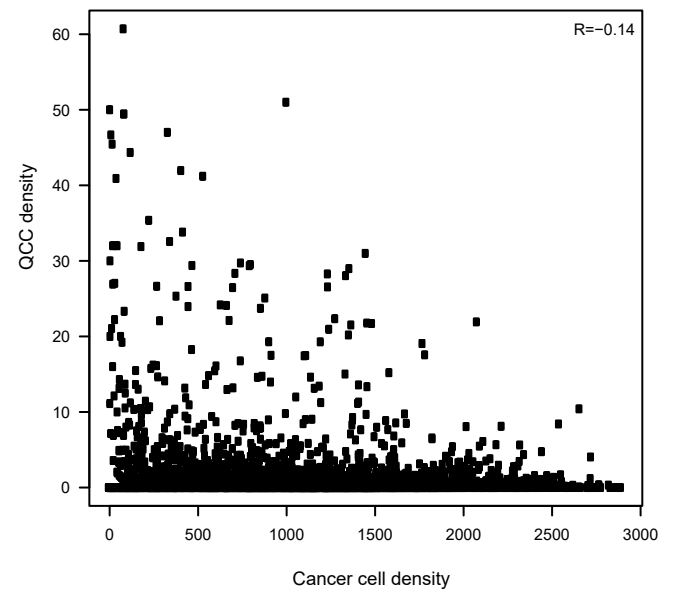

Supplement: MOESM3 [file 13342060]
